# Supplementary material for: The Musa Marker Database: a Comprehensive Genomic Resource for the Improvement of the Musaceae Family
Source: Preprints.org preprint supplement (doi:10.20944/preprints202312.2134.v2), 2024-04-15
Supplement: Supplementary file 1 [file supplementary]

## Sheet: Table S1
	Table S1. Summary of data and SSR mining of Musa species
	Sl	Species name/Genome	Code of the species	Number of sequences	Total sequences size (bp)	Total Number of SSR	Number of SSR containing sequences	Number of sequences containing more than 1 SSR	Number of SSRs present in compound formation	SSR density (1 ssr per ** bp)	ClassII SSR	ClassI SSR	ClassI+ClassII (note: Compund SSR considered as one SSR):	AT rich SSR	GC rich SSR	AT/GC balance	Mono	Di	Tri	Tetra	Penta	Hexa
	1	Musa_acuminata_banksii20	Mabn2	9467	464148587	183911	5435	4171	48724	2523.77	83385	51802	135187	98328	16612	20247	68603	88512	22985	2811	526	474
	2	Musa_acuminata_AAA_Dwarf_Cavendish	Madc	256523	963409601	267698	121368	62132	32487	3598.87	155710	79501	235211	172210	27519	35482	116611	102516	42126	4850	931	664
	3	Musa_acuminata_burmannica10	Mabu	47753	526296796	141919	28701	19201	15973	3708.43	84702	41244	125946	89061	13425	23460	59799	56433	22283	2627	467	310
	4	Musa_acuminata_malaccensis20	Maml2	24	450848473	147255	24	24	28421	3061.69	76160	42674	118834	83764	16648	18422	58523	65494	20064	2366	417	391
	5	Musa_acuminata_malaccensis43	Maml4	12	479218923	185328	12	12	52607	2585.79	85045	47676	132721	93540	19934	19247	68151	90834	22638	2747	441	517
	6	Musa_acuminata_zebrina10	Maze1	56481	638708643	111705	27775	14626	11423	5717.82	65616	34666	100282	71501	8944	19837	45327	46211	17443	2094	393	237
	7	Musa_balbisiana_BGI11	MbBGI1	378	457197862	320858	372	362	190481	1424.92	76347	54030	130377	94019	16798	19560	70921	218888	24905	4214	557	1373
	8	Musa_balbisiana_pkw_draft_2013_10	Mbpkw	12	402547155	131403	12	12	25101	3063.45	68409	37893	106302	73520	14951	17831	53603	57846	17520	1846	283	305
	9	Musa_beccarii_V10	Mbeci	449	569617942	181767	262	169	40301	3133.78	94924	46542	141466	105047	14975	21444	74282	82586	21889	2120	340	550
	10	Musa_itinerans_V10	Mitan	75687	462139488	151683	10118	4927	25576	3046.75	82286	43821	126107	92279	12729	21099	58513	67678	22130	2565	428	369
	11	Musa_schizocarpa_V10	Mscz1	194	525283493	178889	189	182	43333	2936.37	86248	49308	135556	99718	17104	18734	71144	75854	26852	3562	620	857
	12	Musa_textilis_draft	Mtext	48557	650874927	215660	27718	18614	41820	3018.06	125525	48315	173840	120697	30231	22912	106735	82784	22820	2482	336	503
	13	Musa_troglodytarum	Mtrog	10	603587930	197524	10	10	41838	3055.77	109133	46553	155686	108486	24656	22544	87196	84935	21982	2022	295	1094
	14	Ensete_glaucum	Engl	9	481507213	181817	9	9	26309	2648.31	98056	57452	155508	119446	15668	20394	81174	65883	29547	3230	1588	395
	15	Ensete_ventricosum	Envnb	45742	451279456	163773	24996	18080	21237	2755.52	93705	48831	142536	111832	11368	19336	73782	60456	25818	2550	881	286
		Max		256523	963409601	320858	121368	62132	190481	5717.82	155710	79501	235211	172210	30231	35482	116611	218888	42126	4850	1588	1373
		Min		9	402547155	111705	9	9	11423	1424.92	65616	34666	100282	71501	8944	17831	45327	46211	17443	1846	283	237
		Average		36086.5	5.41778e+08	184079	16466.7	9502.07	43042.1	3085.29	92350.1	48687.2	141037	102230	17437.5	21369.9	72957.6	83127.3	24066.8	2805.73	566.867	555
		Total		541298	8126666489	2761190	247001	142531	645631	46279.3	1385251	730308	2115559	1533448	261562	320549	1094364	1246910	361002	42086	8503	8325

## Sheet: Table S2
	Table S2. Summary of the SNP Mining and characterization
	Item	Count
	A/T	6521
	A/C	6540
	G/T	6599
	G/C	6771
	A/G	17098
	C/T	17284
	Compound	441
	Indel	2334
	Transversions	26431
	Transitions	34382
	Genic	24376
	NonGenic	39212
	distribution of SNP in genic and non-genic regions
		Genic	NonGenic
	Compound	165	276
	Indel	332	2002
	Transitions	14699	19683
	Transversions	9180	17251

## Sheet: Table S3
	Table S3. Comparison of MMdb with other related databases.
	Features	MMDB	SSRome	PMDBase	BanSatDb	TropGENE
	Number of Musa species	12	1 (Musa acuminata)	currently this databse offline	3	unknown
	Microsatellites	YES	YES		YES	YES
	SNP	YES	NO		NO	YES
	ILP	YES	NO		NO	NO
	Search Criteria	10+ Flexable, advance	2 (Plant Genic Region; Plant Non-genic Region) very limited, Non-flexable		3 (Motif Type, Repeat Motif and Repeat Kind), But those are not able to commbind for search	3 (Marker Type; Makers Name; Chromosome number)
	Non-redundant markers	YES	NO	NO	NO	NO
	Primer validation e-PCR	YES	NO	NO	NO	NO
	Marker Transferability	YES	NO	NO	NO	NO
	Functional annotations	YES	NO	NO	NO	NO
	Genomic Locations	YES	YES
	Genic and non-genic classification	YES	YES
	Class I and Class II classification	YES	NO	NO	NO	NO
